# Supplementary material for: Skeletal Muscle MicroRNA Patterns in Response to a Single Bout of Exercise in Females: Biomarkers for Subsequent Training Adaptation?
Source: MDPI journal article supplement (doi:10.3390/biom13060884), 2023-05-24
Supplement: s1 [file s1]

| miR             | pre (log(2)) | post (log(2)) | fold change | p      | FDR p  |
|-----------------|--------------|---------------|-------------|--------|--------|
| hsa-miR-5189-3p | 9.16         | 0.8           | -356.42     | ***    | ***    |
| hsa-miR-2115-5p | 7.54         | 0.65          | -134.84     | ***    | ***    |
| hsa-miR-6808-3p | 6.13         | 0.73          | -43.36      | ***    | ***    |
| hsa-miR-6806-3p | 4.77         | 0.63          | -19.12      | ***    | ***    |
| hsa-miR-4330    | 4.24         | 0.56          | -16.64      | ***    | ***    |
| hsa-miR-101-5p  | 4.1          | 0.65          | -11.54      | ***    | ***    |
| hsa-miR-4635    | 3.72         | 0.7           | -10.8       | ***    | ***    |
| hsa-miR-30e-3p  | 4.97         | 2.11          | -10.49      | ***    | ***    |
| hsa-miR-152-3p  | 6.71         | 4.44          | -7.82       | ***    | **     |
| hsa-miR-199a-5p | 4.66         | 2.12          | -7.69       | **     | 0.068  |
| hsa-miR-499a-5p | 3.63         | 1.64          | -7.61       | ***    | *      |
| hsa-miR-18a-5p  | 5.67         | 3.74          | -7.39       | **     | 0.0808 |
| hsa-miR-30a-3p  | 7.29         | 4.83          | -7.15       | ***    | ***    |
| hsa-miR-660-5p  | 3.6          | 1.23          | -7.06       | **     | *      |
| hsa-miR-29c-3p  | 3.14         | 1.29          | -6.91       | *      | 0.1392 |
| hsa-miR-30e-5p  | 4.86         | 2.35          | -6.87       | ***    | **     |
| hsa-miR-497-5p  | 3.12         | 1.12          | -6.46       | **     | 0.07   |
| hsa-miR-128-3p  | 6.07         | 3.92          | -6.36       | ***    | **     |
| hsa-miR-489-3p  | 4.5          | 2.73          | -6.19       | *      | 0.1814 |
| hsa-miR-4663    | 2.83         | 0.79          | -5.85       | ***    | *      |
| hsa-miR-199a-3p | 7.62         | 5.42          | -5.80       | ***    | **     |
| hsa-miR-199b-3p | 7.62         | 5.42          | -5.80       | ***    | **     |
| hsa-miR-192-5p  | 3.40         | 1.97          | -5.36       | **     | *      |
| hsa-miR-363-3p  | 4.15         | 2.115         | -5.36       | **     | 0.1016 |
| hsa-miR-19b-3p  | 7.93         | 5.71          | -5.33       | ***    | **     |
| hsa-miR-22-5p   | 3.53         | 1.90          | -5.26       | **     | 0.0654 |
| hsa-miR-15a-5p  | 5.86         | 3.73          | -5.12       | ***    | *      |
| hsa-miR-10a-5p  | 3.5          | 1.75          | -4.93       | **     | *      |
| hsa-miR-1       | 10.22        | 8.12          | -4.91       | ***    | ***    |
| hsa-miR-106b-5p | 7.91         | 6.45          | -4.77       | *      | 0.1182 |
| hsa-miR-3175    | 2.16         | 2.04          | -4.74       | 0.9208 | 0.9764 |
| hsa-miR-362-5p  | 3.75         | 2.68          | -4.69       | 0.1397 | 0.5140 |
| hsa-miR-27a-3p  | 8.21         | 6.22          | -4.64       | ***    | ***    |
| hsa-miR-4306    | 3.06         | 2.04          | -4.57       | 0.1692 | 0.5486 |
| hsa-miR-133a-5p | 6.97         | 4.98          | -4.54       | ***    | ***    |
| hsa-miR-8089    | 3.13         | 4.99          | 4.60        | ***    | *      |
| hsa-miR-3188    | 2.75         | 4.48          | 4.62        | **     | *      |
| hsa-miR-939-5p  | 1.76         | 3.67          | 4.65        | ***    | **     |
| hsa-miR-197-5p  | 3.75         | 5.725         | 4.85        | ***    | **     |
| hsa-miR-6124    | 3.57         | 5.475         | 4.92        | ***    | *      |
| hsa-miR-1229-5p | 2.66         | 4.60          | 4.97        | ***    | ***    |
| hsa-miR-7151-3p | 1.05         | 3.3           | 5.08        | ***    | ***    |
| hsa-miR-2110    | 2.77         | 4.72          | 5.57        | **     | *      |
| hsa-miR-6848-5p | 2.48         | 4.69          | 5.60        | ***    | **     |
| hsa-miR-6831-5p | 4.78         | 6.53          | 5.64        | **     | 0.0872 |

|                 |       |       |       |        |        |
|-----------------|-------|-------|-------|--------|--------|
| hsa-miR-7109-5p | 3.60  | 5.70  | 5.66  | **     | *      |
| hsa-miR-4667-5p | 2.69  | 4.68  | 5.74  | **     | 0.068  |
| hsa-miR-7162-3p | 1.53  | 3.93  | 6.15  | ***    | *      |
| hsa-miR-132-3p  | 1.86  | 4.25  | 6.46  | ***    | **     |
| hsa-miR-155-5p  | 0.97  | 3.605 | 7.32  | ***    | ***    |
| hsa-miR-1226-5p | 1.26  | 4.25  | 8.32  | ***    | ***    |
| hsa-miR-7641    | 4.055 | 5.46  | 17.34 | 0.1420 | 0.5157 |
| hsa-miR-6846-5p | 1.53  | 6.12  | 24.37 | ***    | ***    |
| hsa-miR-4743-5p | 2.42  | 7.98  | 47.98 | ***    | ***    |
| hsa-miR-4505    | 6.08  | 11.44 | 49.64 | ***    | ***    |

**Suppl. Tab.1.** miRs found to be regulated 4.5-fold or more in microarray analysis (n = 6). Values are log(2)-transformed data, as calculated by the program Transcriptome Analysis Console (TAC). P values and FDR (false discovery rate-corrected) p values are given for each miR. Differential expression of miRs labelled in red was subsequently verified by qPCR analysis. \*:  $p \leq 0.05$ ; \*\*:  $p \leq 0.01$ ; \*\*\*:  $p \leq 0.001$ .

| training<br>#1                         | $\dot{V}O_{2max}$ .<br>T0<br>[mL/kgxmin] | $\dot{V}O_{2max}$ .<br>T1<br>[mL/kgxmin] | $\Delta\dot{V}O_{2max}$ .<br>T0/T1<br>[mL/kgxmin] | training<br>#2                         | $\dot{V}O_{2max}$ .<br>T2<br>[mL/kgxmin] | $\Delta\dot{V}O_{2max}$ .<br>T0/T2<br>[mL/kgxmin] | $\Delta\dot{V}O_{2max}$ .<br>T1/T2<br>[mL/kgxmin] |
|----------------------------------------|------------------------------------------|------------------------------------------|---------------------------------------------------|----------------------------------------|------------------------------------------|---------------------------------------------------|---------------------------------------------------|
| <b>all<br/>participants<br/>(n=29)</b> | 29.98<br>±3.22                           | 33.92<br>±4.02                           | 3.8<br>±2.45                                      | <b>all<br/>participants<br/>(n=23)</b> | 34.89<br>±4.1                            | 4.98<br>±3.08                                     | 0.91<br>±2.78                                     |
| <b>HIIT-MICT<br/>(n=13)</b>            | 30.84<br>±2.74                           | 36.07<br>±2.61                           | 5.23<br>±1.69                                     | <b>HIIT-MICT<br/>(n=11)</b>            | 36.2<br>±3.55                            | 4.81<br>±3.04                                     | -0.51<br>±2.9                                     |
| <b>MICT-HIIT<br/>(n=16)</b>            | 29.28<br>±3.4                            | 31.91<br>±3.7                            | 2.63<br>±2.36                                     | <b>MICT-HIIT<br/>(n=12)</b>            | 33.69<br>±3.81                           | 4.92<br>±3.11                                     | 2.22<br>±1.88                                     |

**Suppl. Tab. 2.**  $\dot{V}O_{2max}$  data (means and standard deviations) of all subjects included in qPCR analysis. The first six weeks of training (training #1) were completed by n=29 female participants, the second block (training #2) only by n=23, due to COVID19-associated restrictions. “HIIT-MICT” corresponds to subjects randomized to starting with HIIT (training #1) and then switching to MICT (training #2), “MICT-HIIT” to the group that completed the training sessions in reverse order.

**a) hsa-miR-1(-3p) array data**

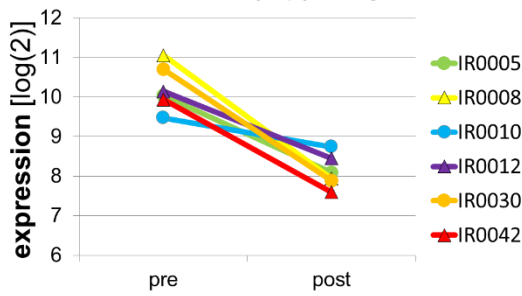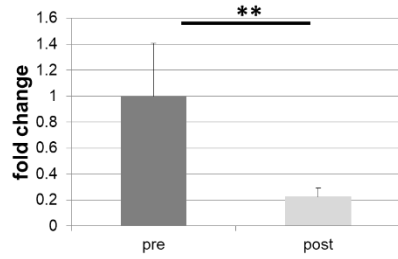

**hsa-miR-1(-3p) qPCR data**

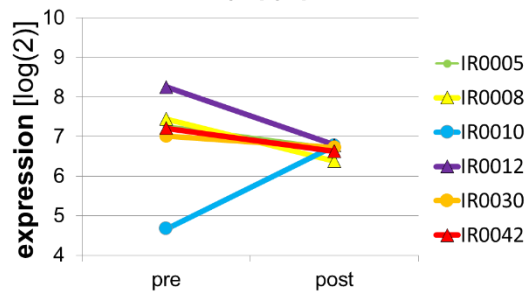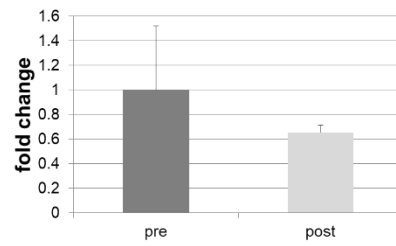

**b) hsa-miR-1(-3p) qPCR data**

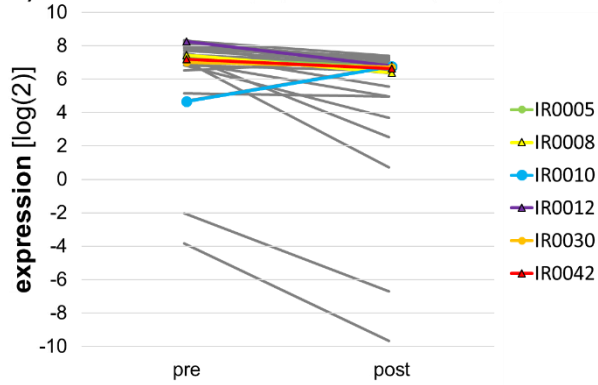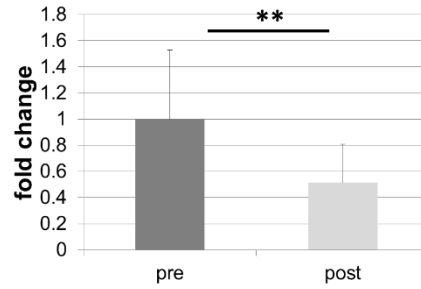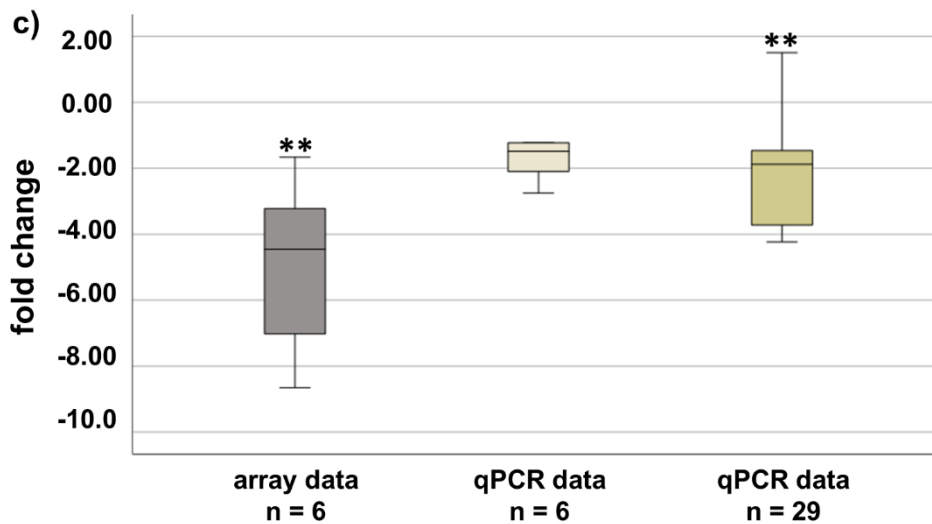

a) hsa-miR-133a-3p array data

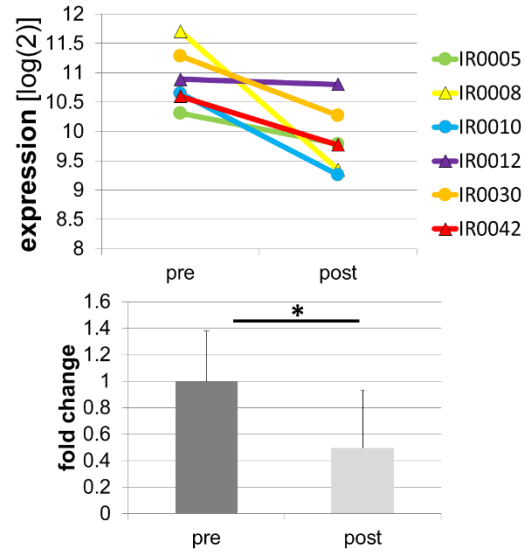

hsa-miR-133a-3p qPCR data

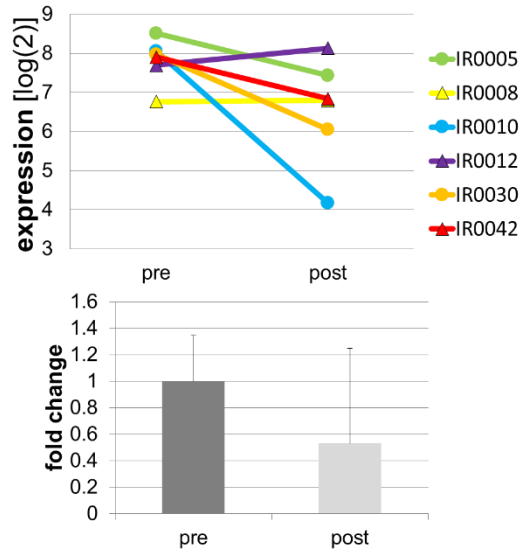

b) hsa-miR-133a-3p qPCR data

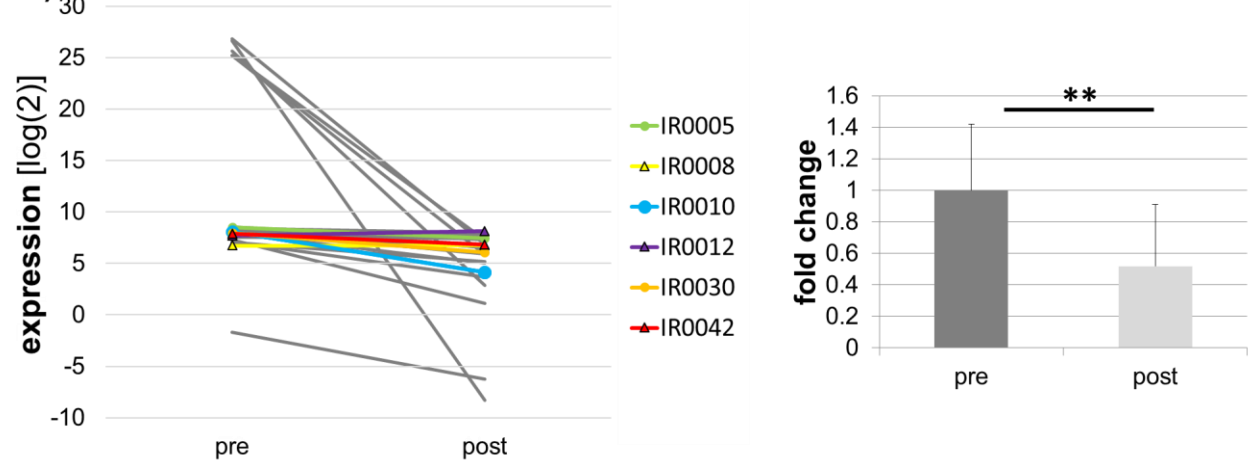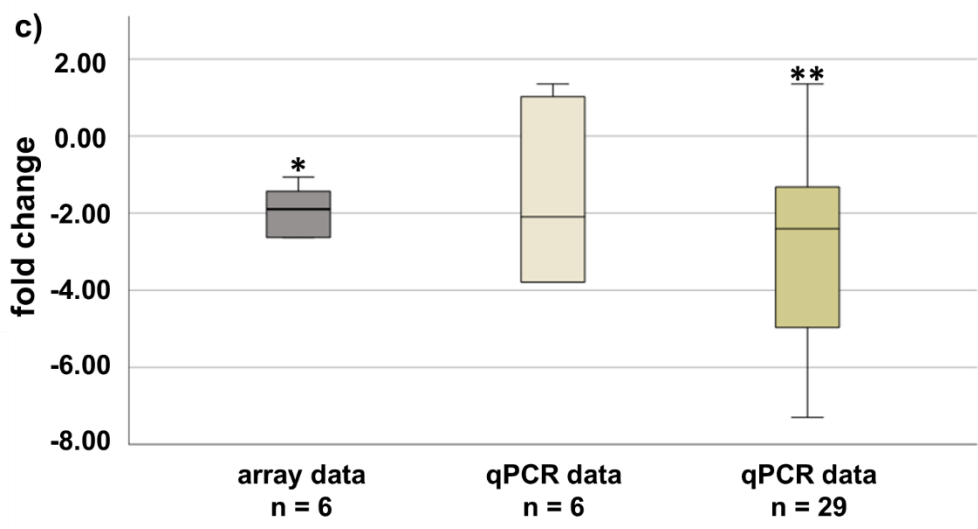

**a) hsa-miR-133a-5p array data**

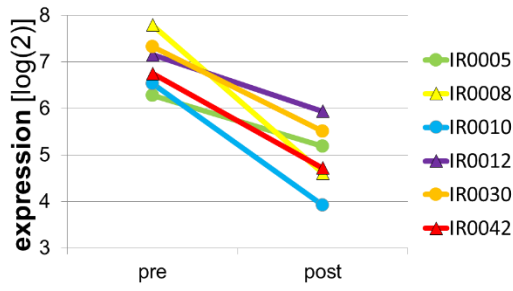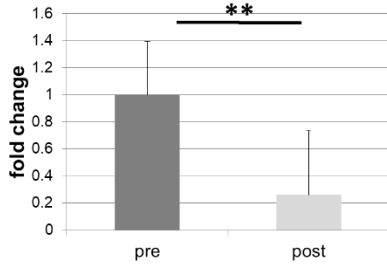

**hsa-miR-133a-5p qPCR data**

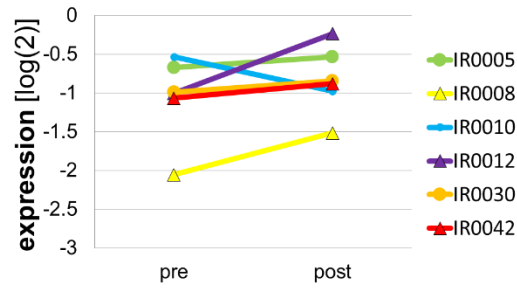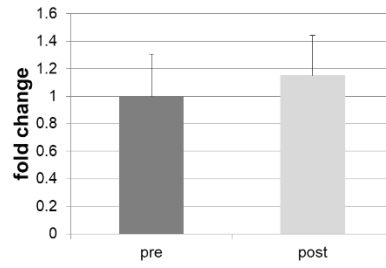

**b) hsa-miR-133a-5p qPCR data**

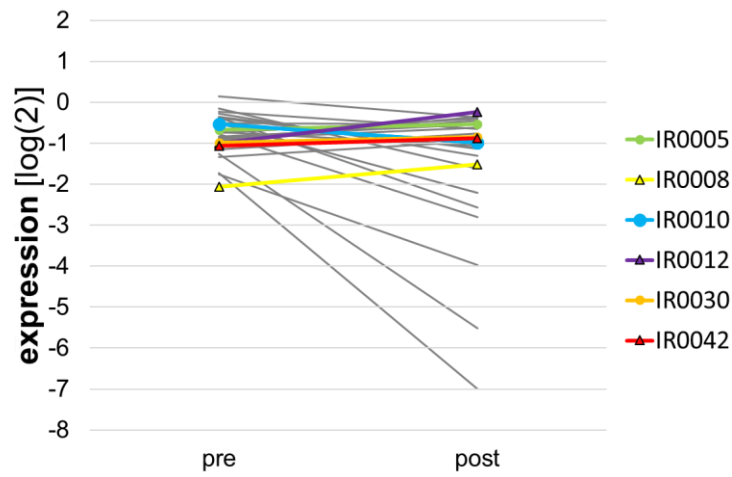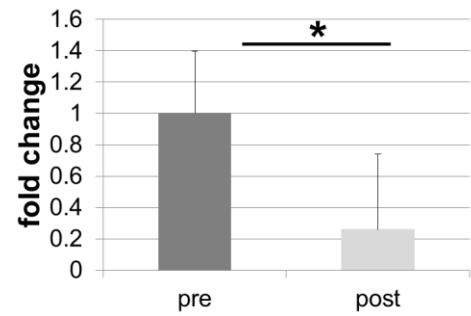

**c)**

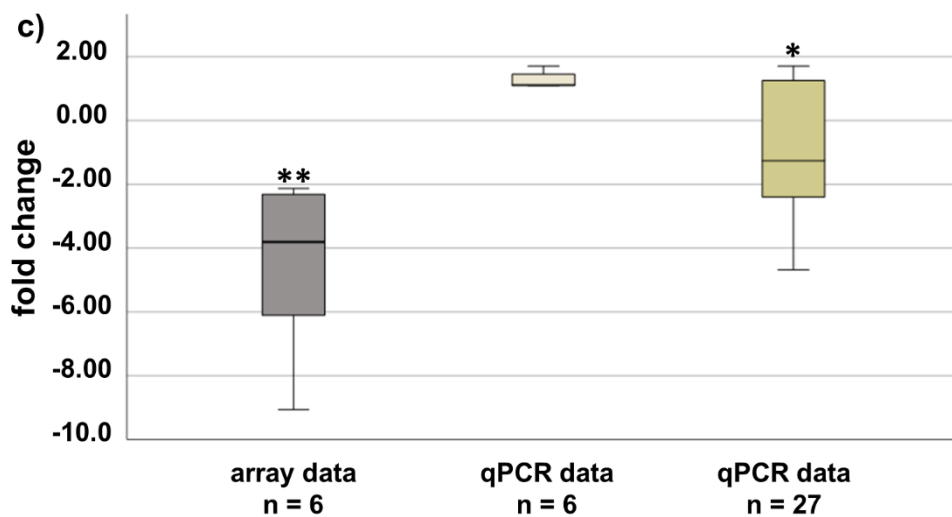

a) **hsa-miR-133b array data**

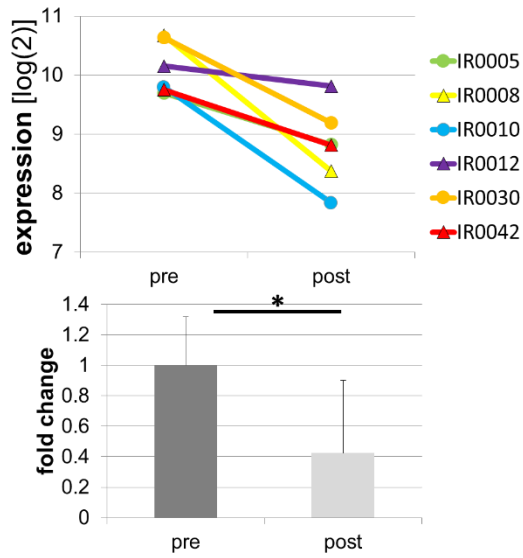

**hsa-miR-133b qPCR data**

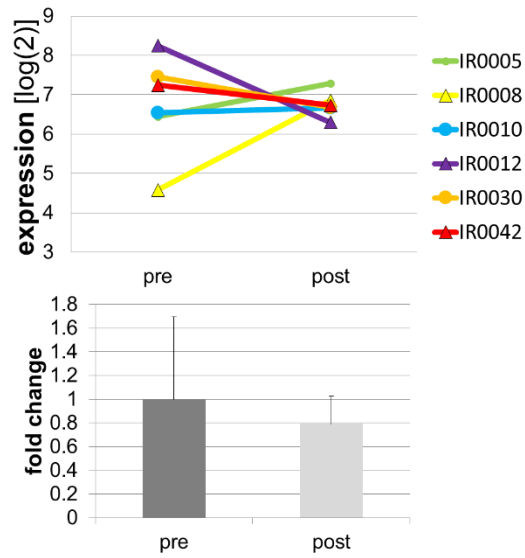

b) **hsa-miR-133b qPCR data**

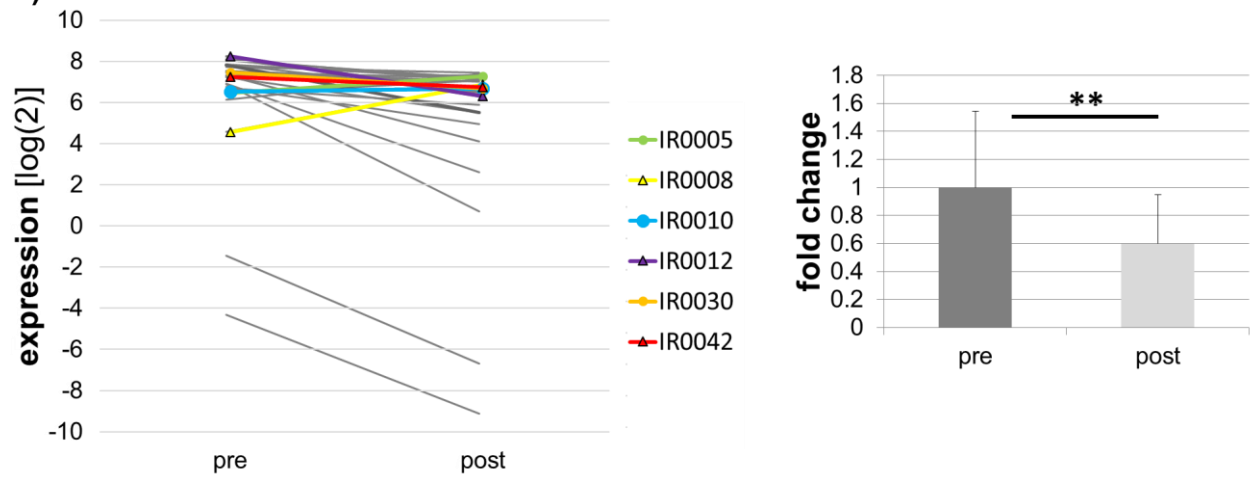

c)

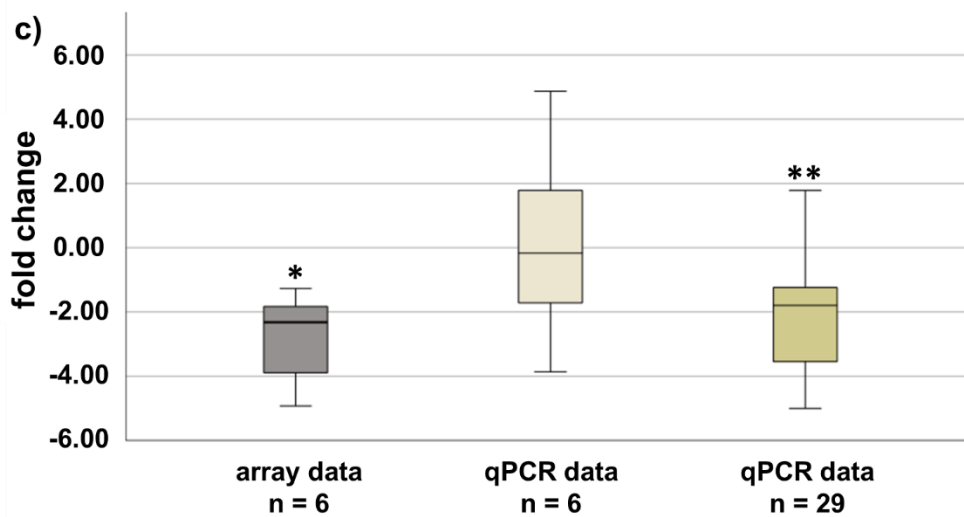

a) hsa-miR-499a-5p array data

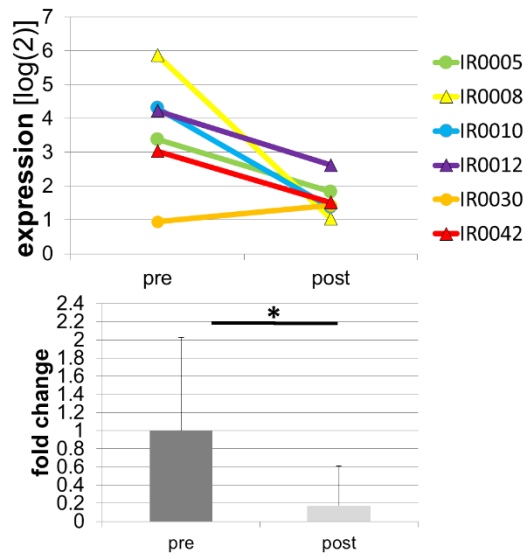

hsa-miR-499a-5p qPCR data

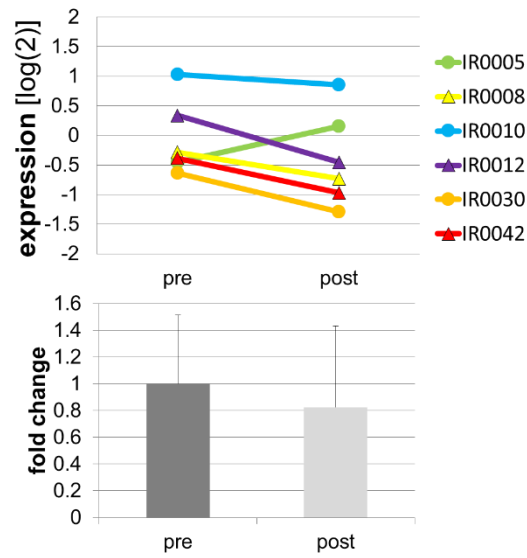

b) hsa-miR-499a-5p qPCR data

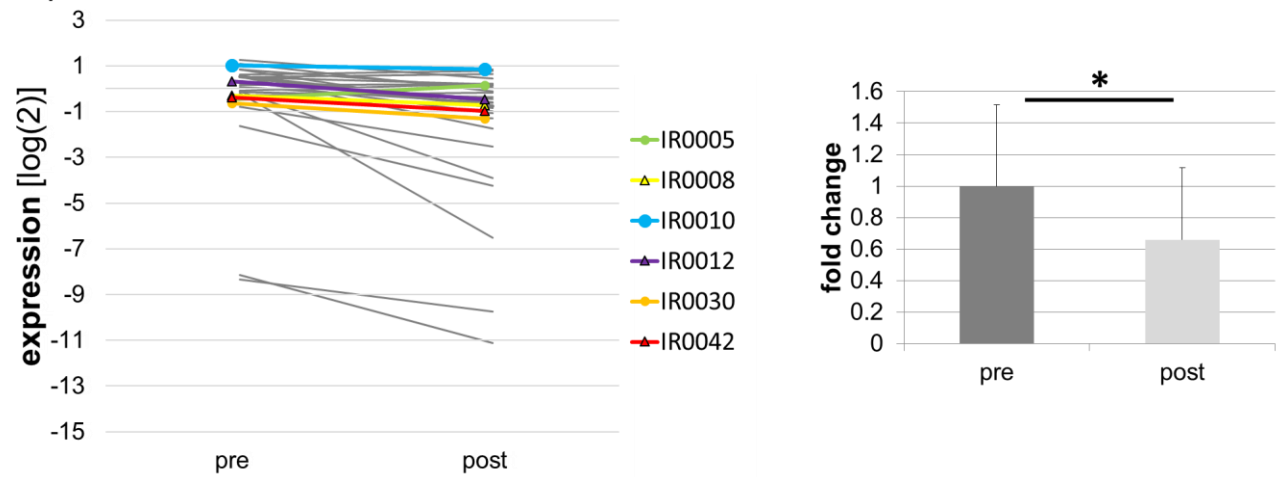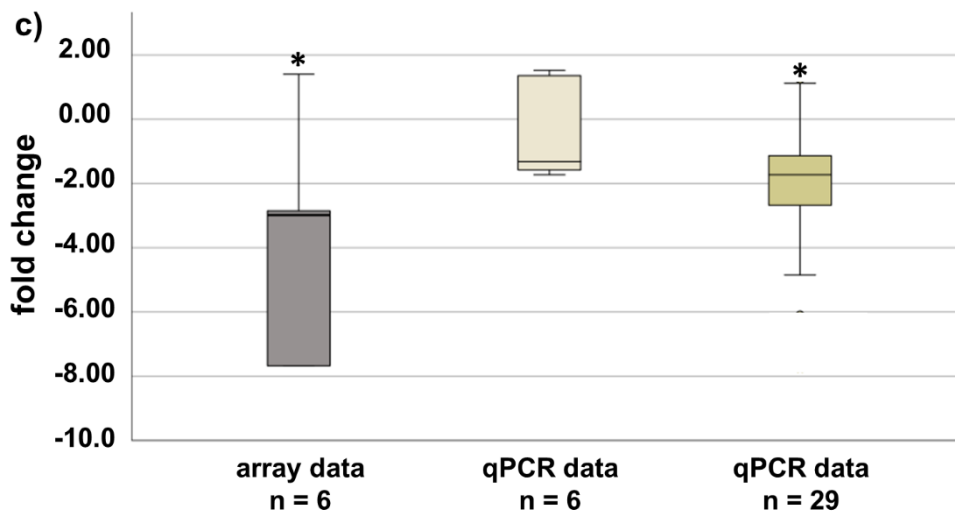



a) hsa-miR-27a-3p array data

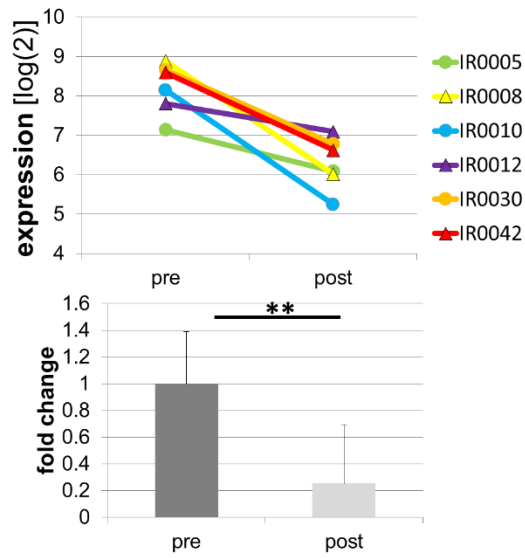

hsa-miR-27a-3p qPCR data

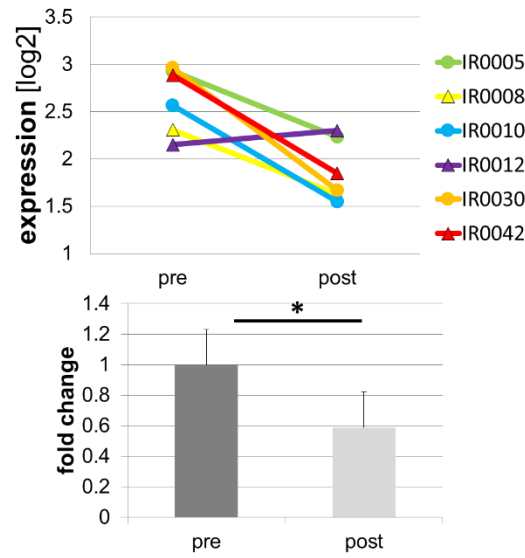

b) hsa-miR-27a-3p qPCR data

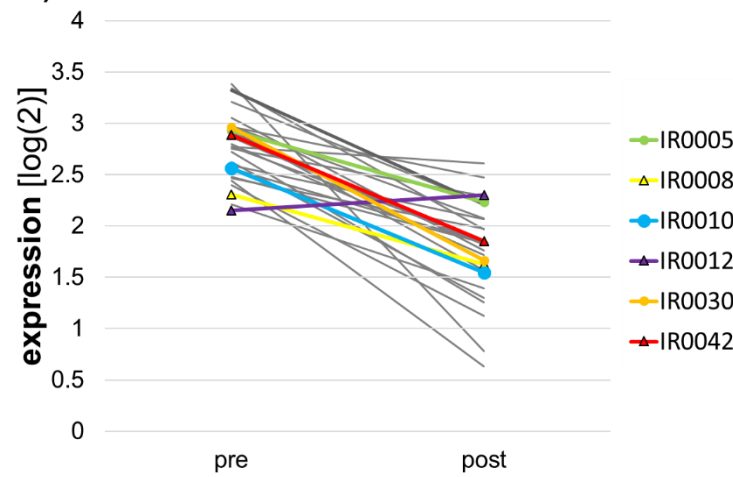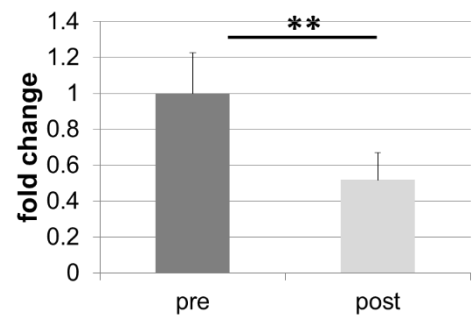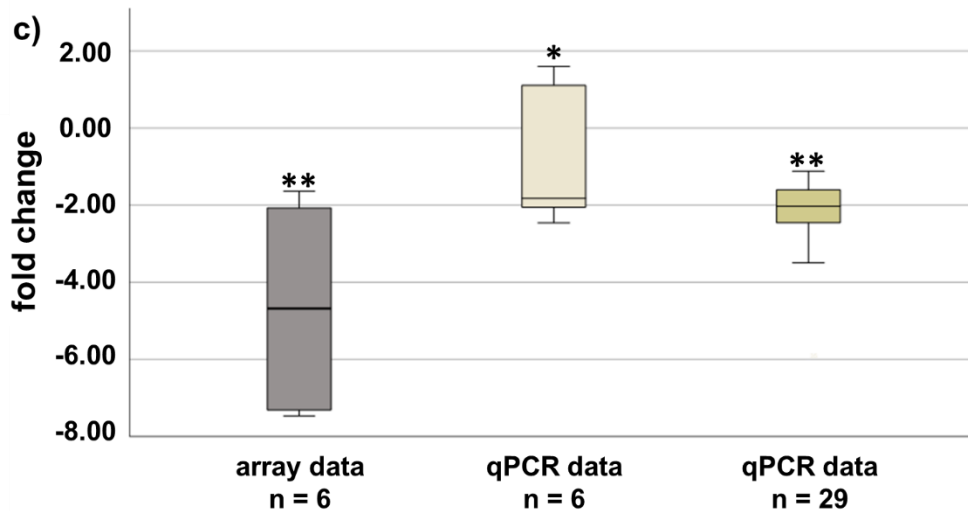

a) hsa-miR-378a-5p array data

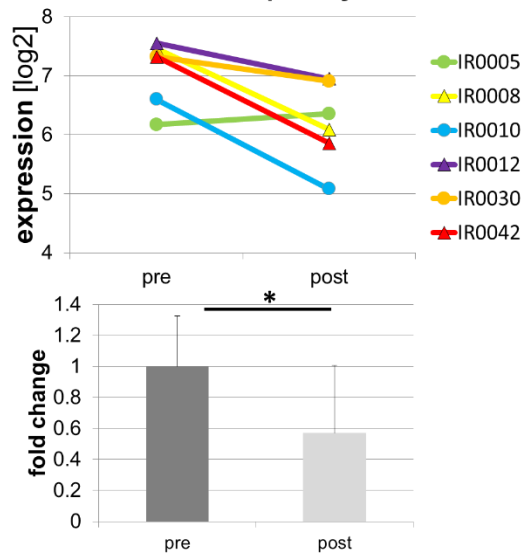

hsa-miR-378a-5p qPCR data

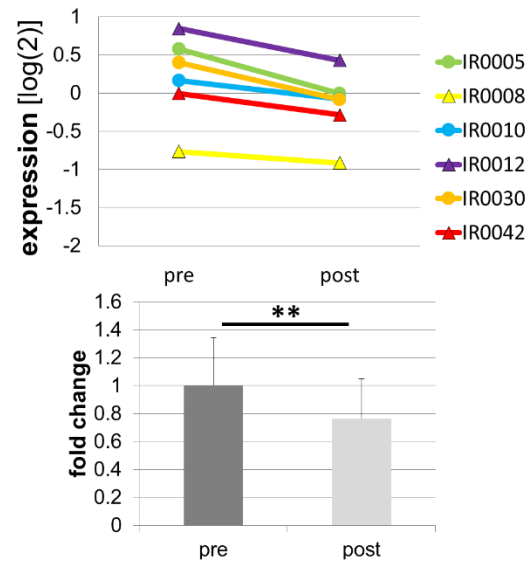

b) hsa-miR-378-5p qPCR data

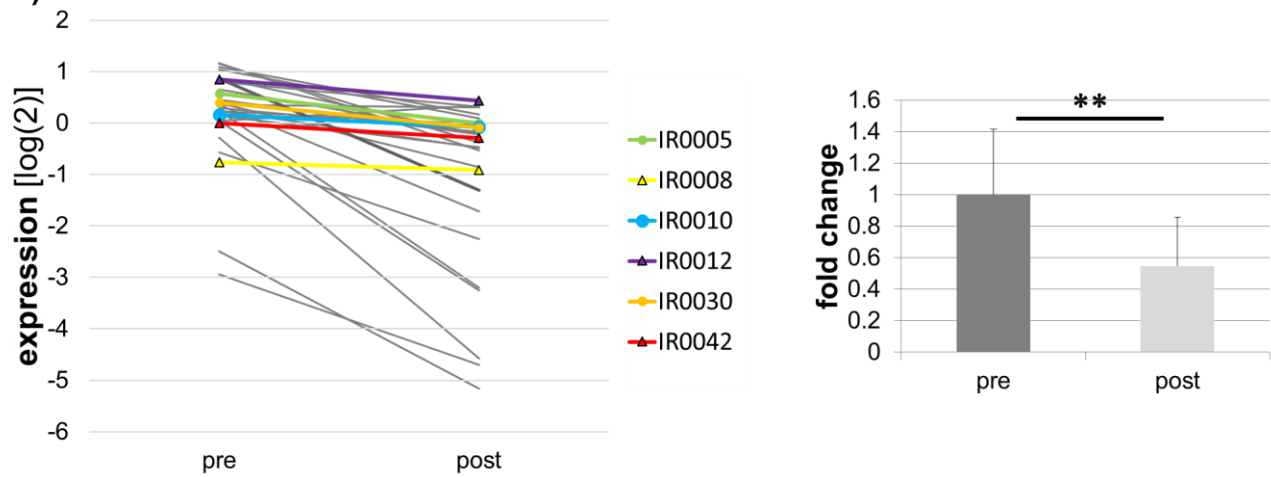

c)

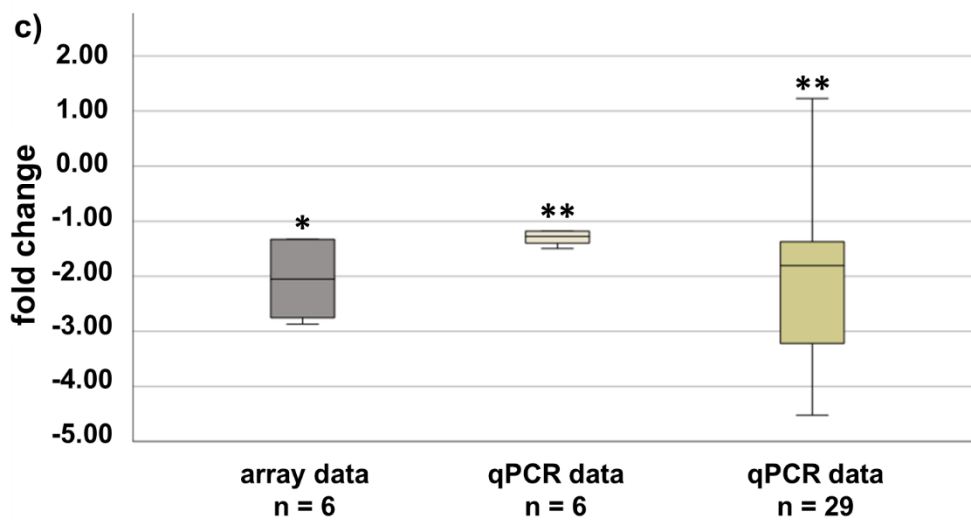

a) hsa-miR-497-5p array data

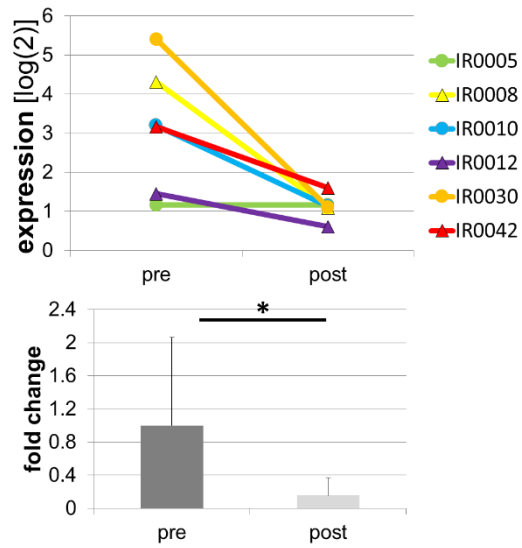

hsa-miR-497-5p qPCR data

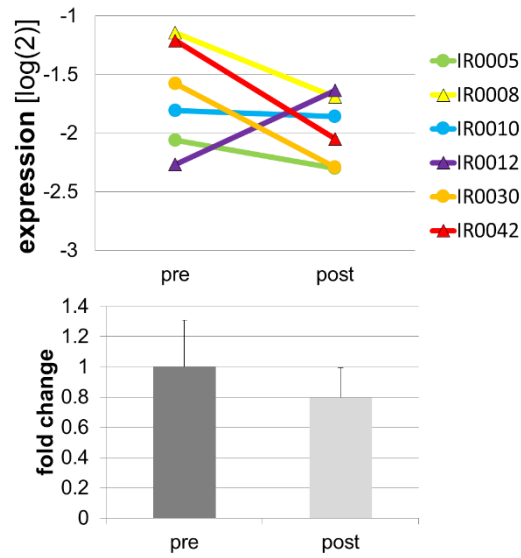

b) hsa-miR-497-5p qPCR data

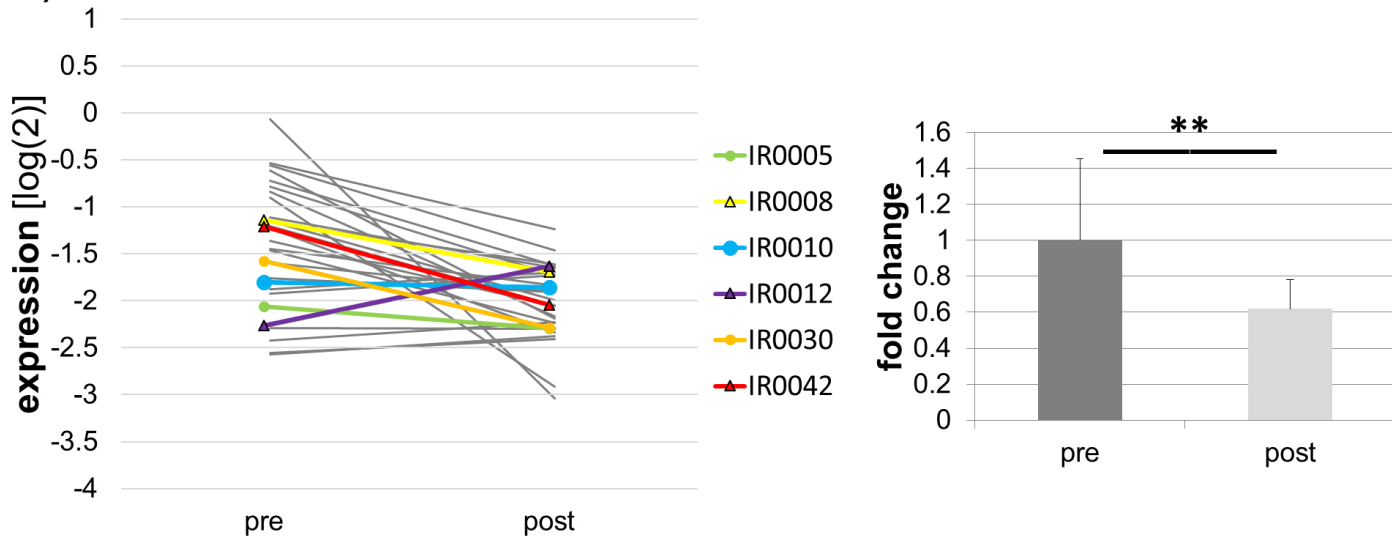

c)

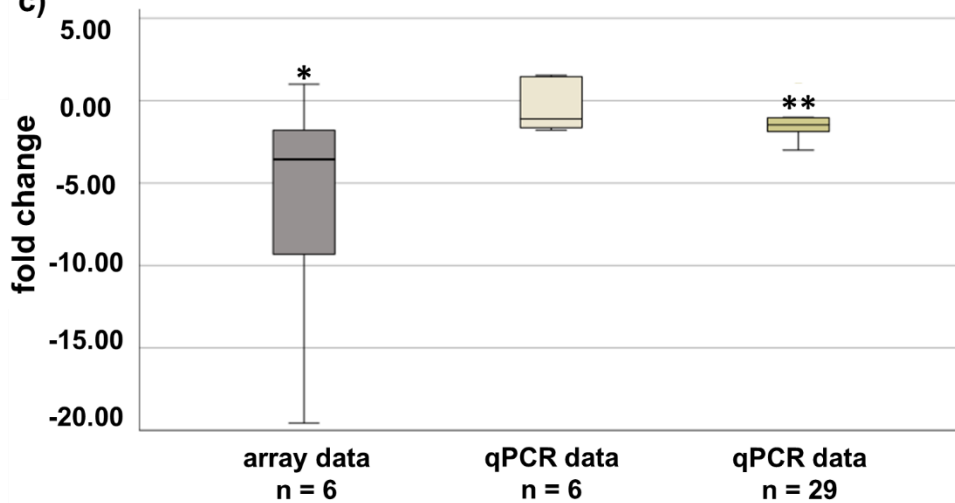

**a) hsa-miR-199a-3p array data**

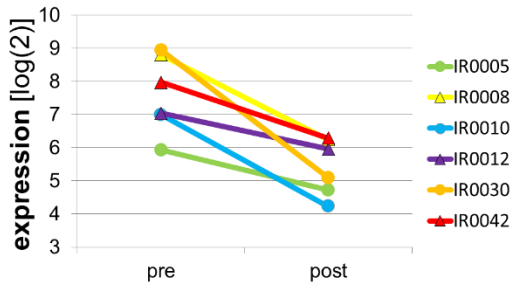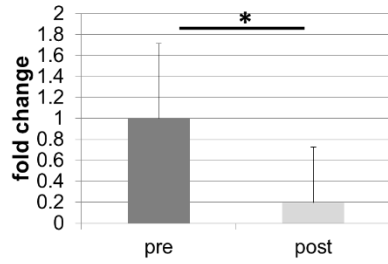

**hsa-miR-199a-3p qPCR data**

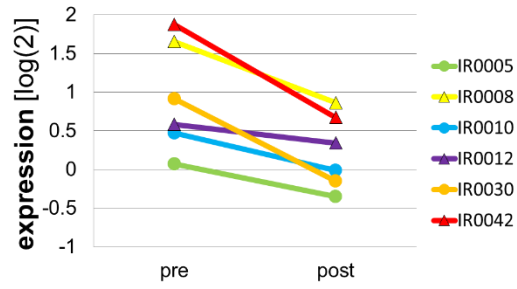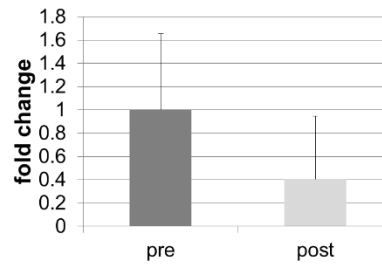

**b) hsa-miR-199a-3p qPCR data**

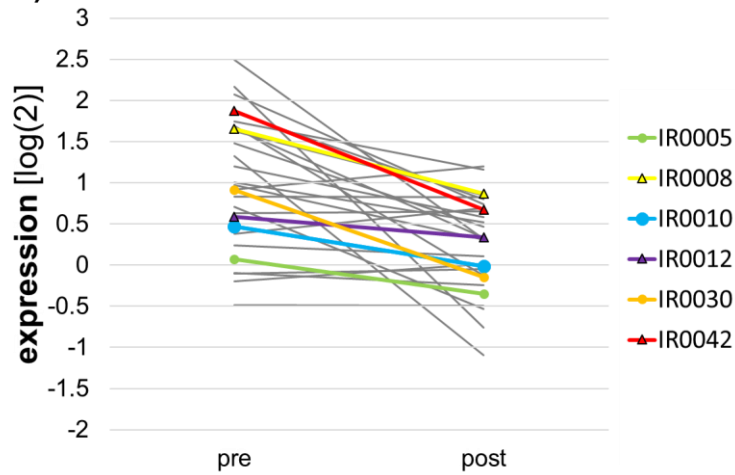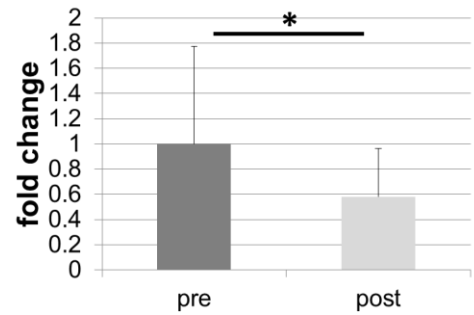

**c)**

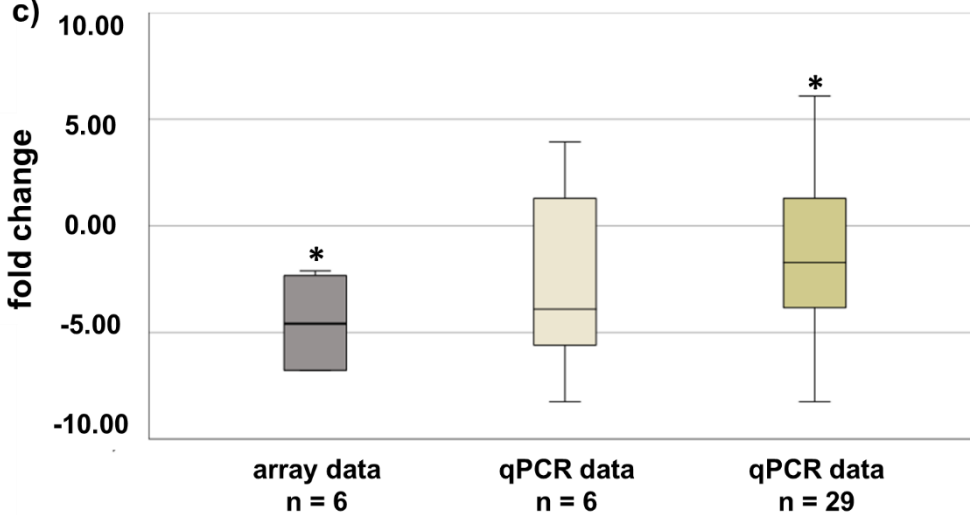

a) hsa-miR-199a-5p array data

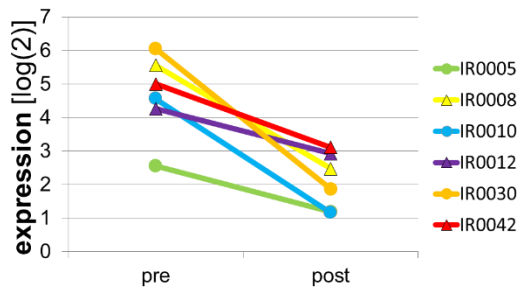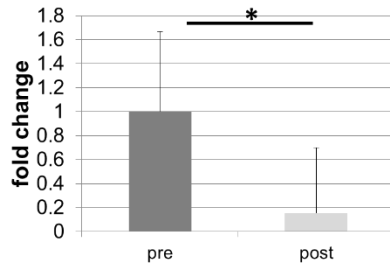

hsa-miR-199a-5p qPCR data

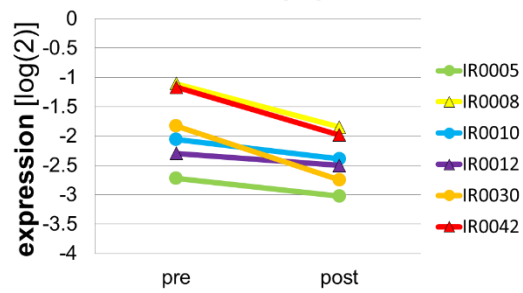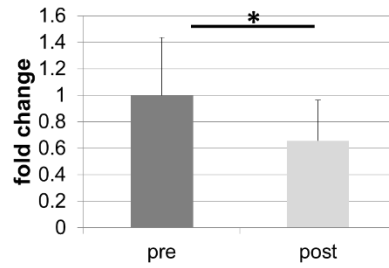

b) hsa-miR-199a-5p qPCR data

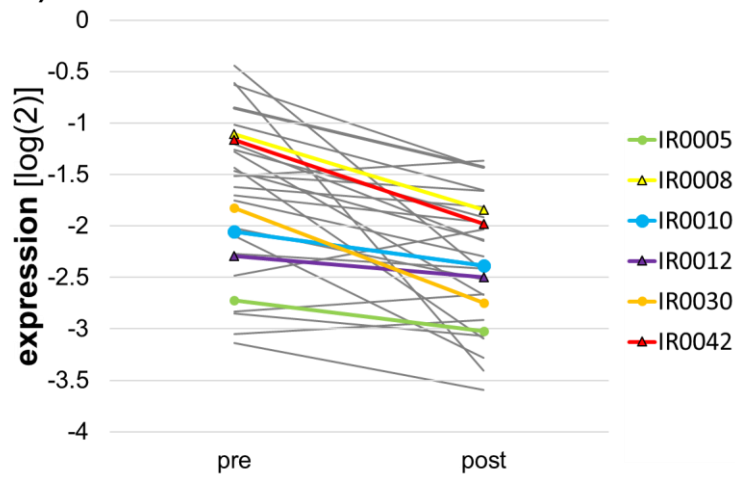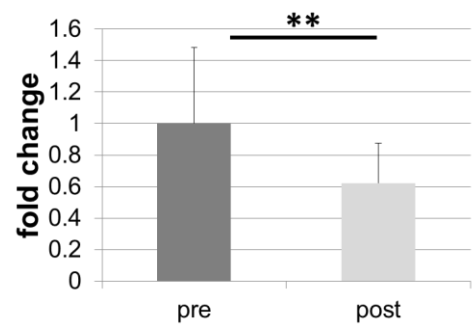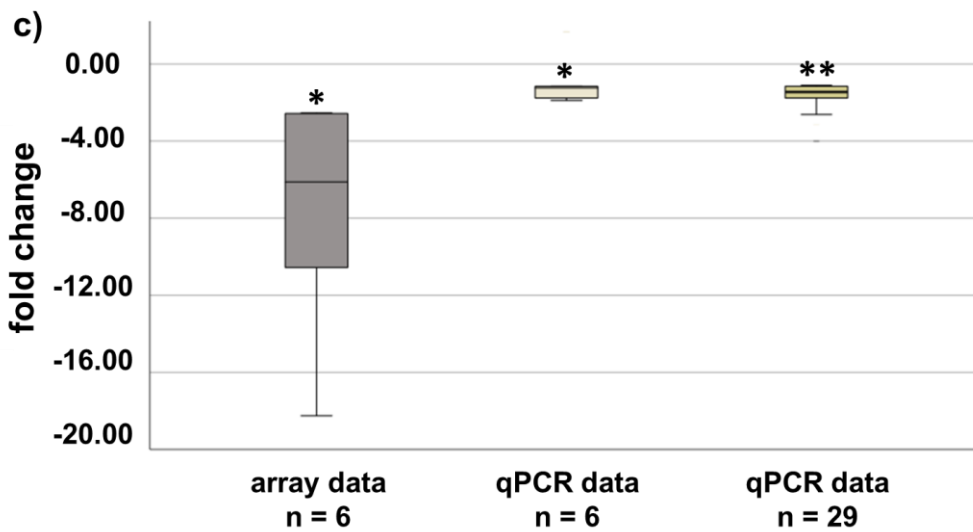

a) hsa-miR-15a-5p array data

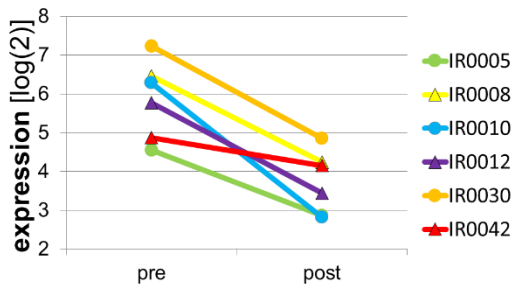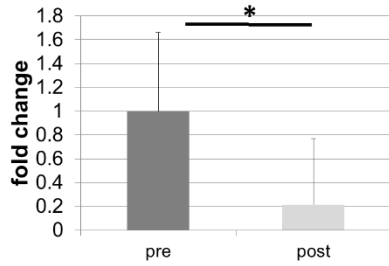

hsa-miR-15a-5p qPCR data

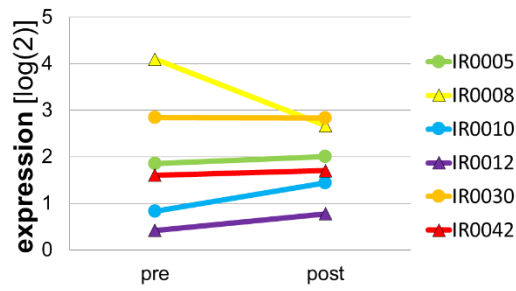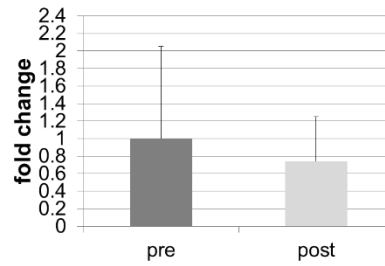

b) hsa-miR-15a-5p qPCR data

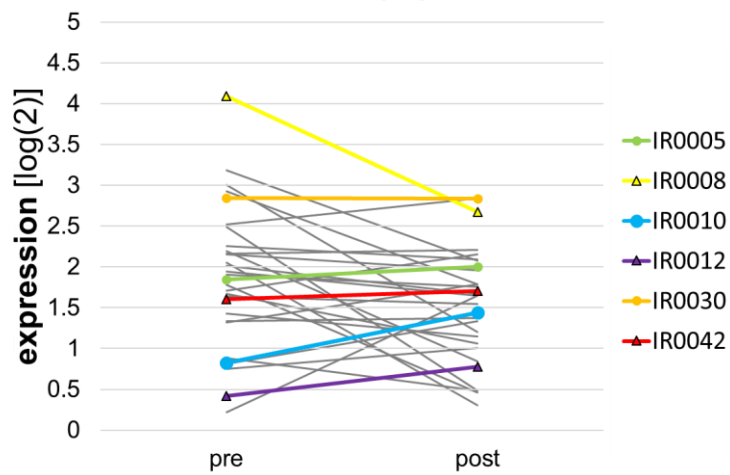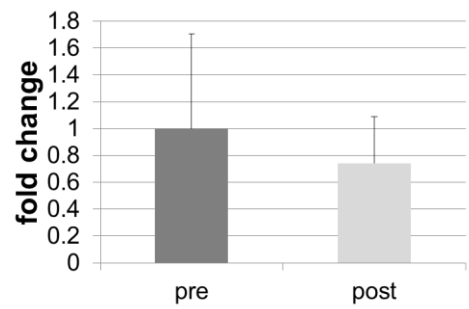

c)

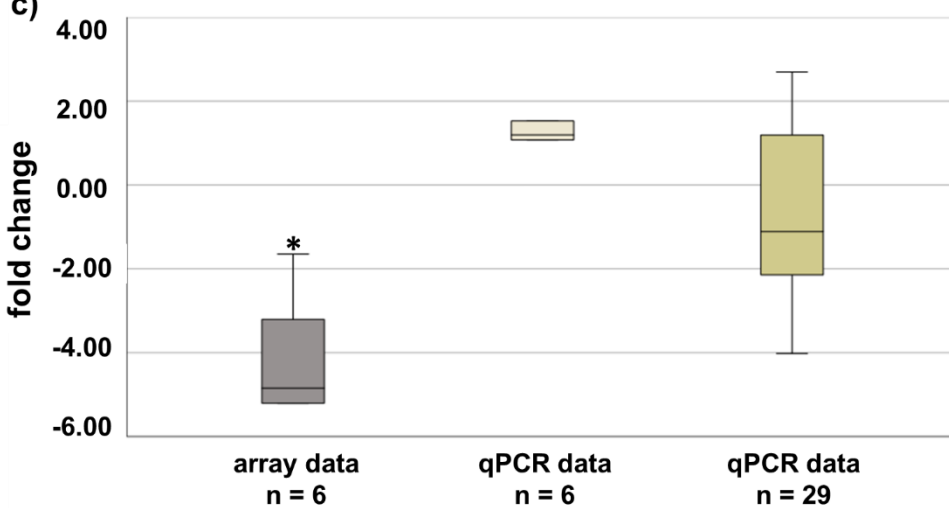

a) hsa-miR-18a-5p array data

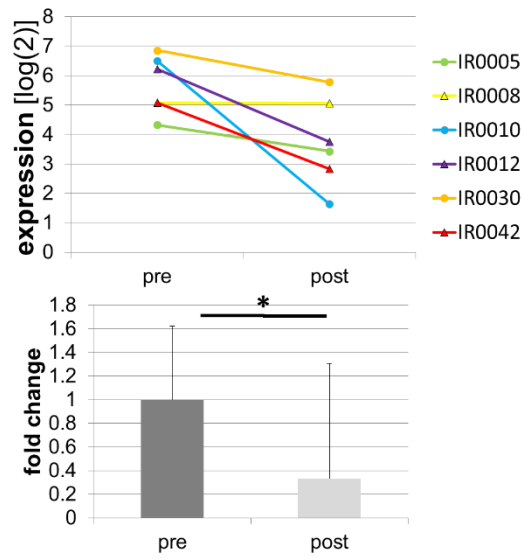

hsa-miR-18a-5p qPCR data

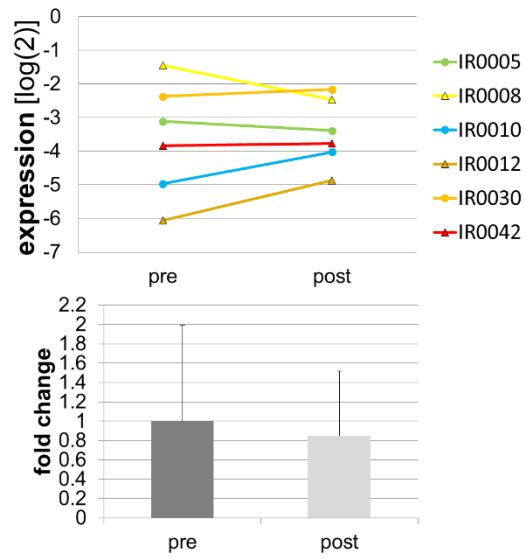

b) hsa-miR-18a-5p qPCR data

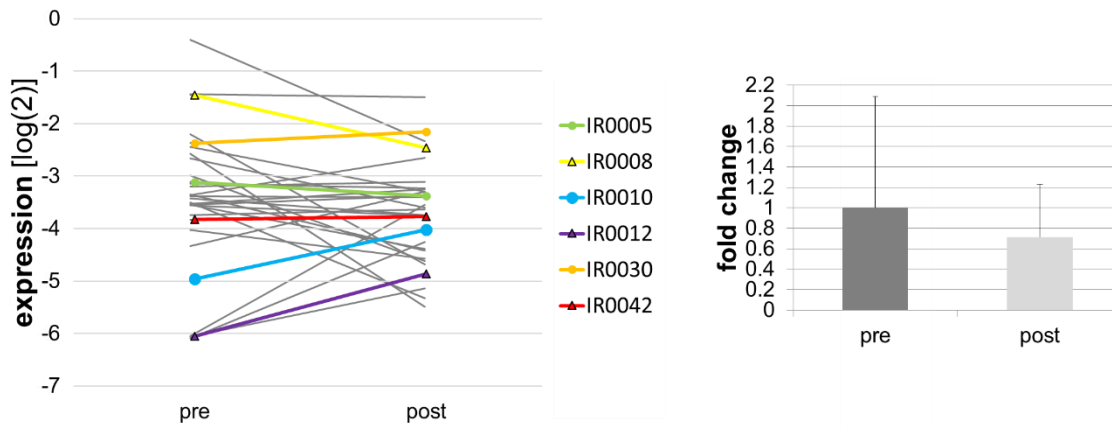

c)

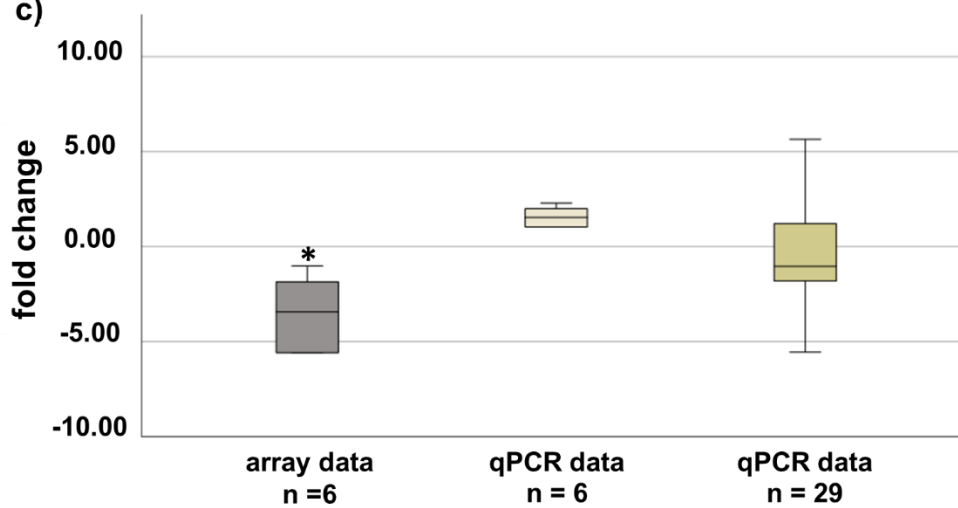

a) hsa-miR-19b-3p array data

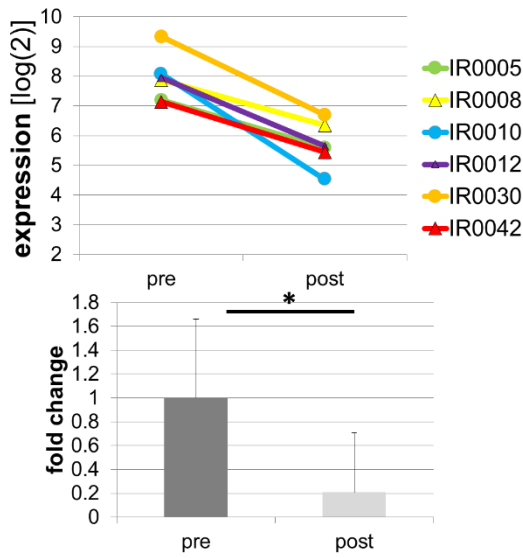

hsa-miR-19b-3p qPCR data

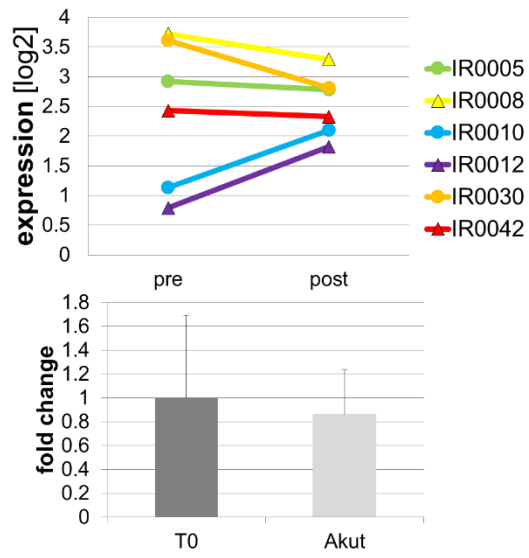

b) hsa-miR-19b-3p qPCR data

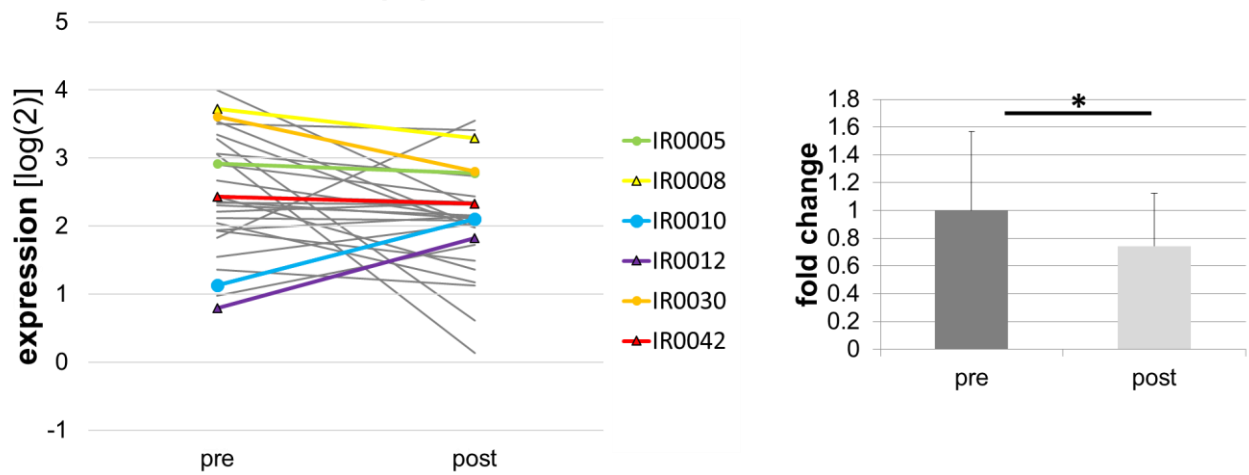

c)

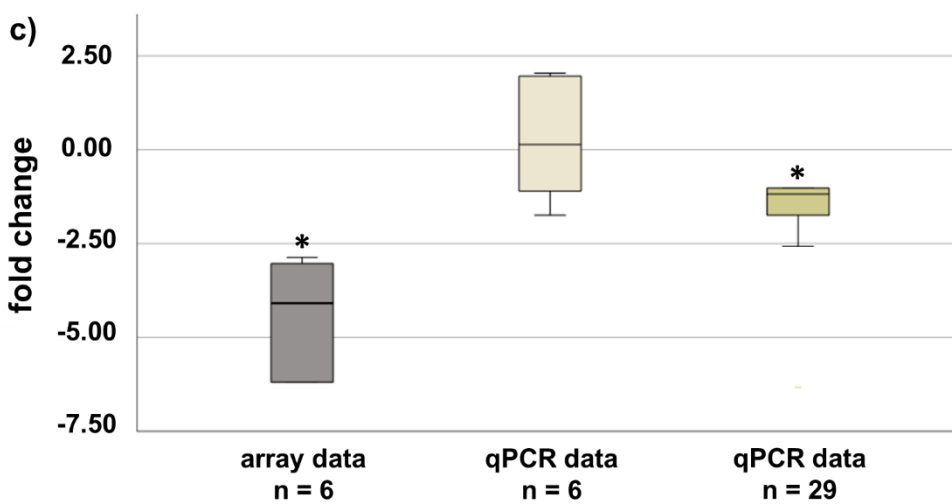



a) hsa-miR-132-3p array data

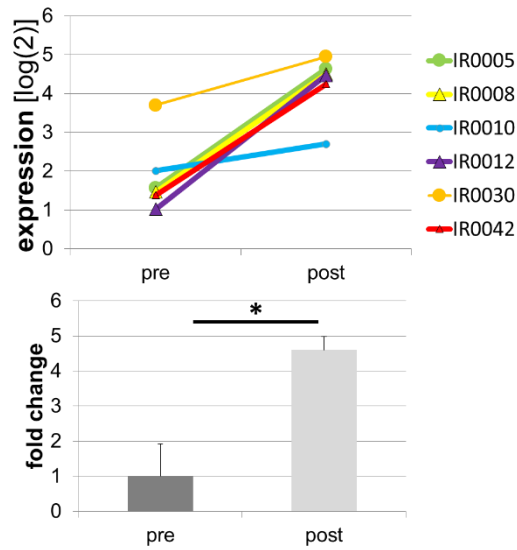

hsa-miR-132-3p qPCR data

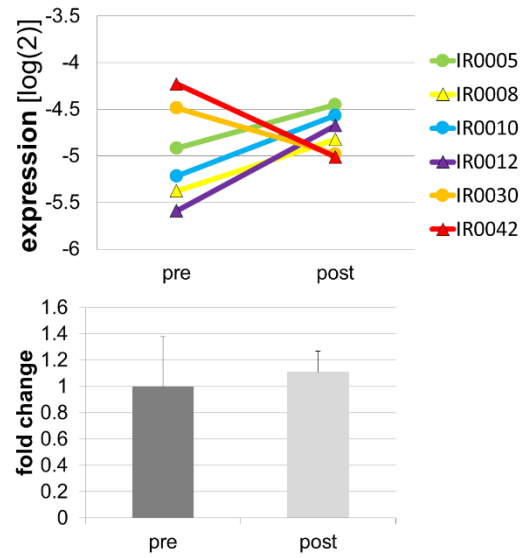

b) hsa-miR-132-3p qPCR data

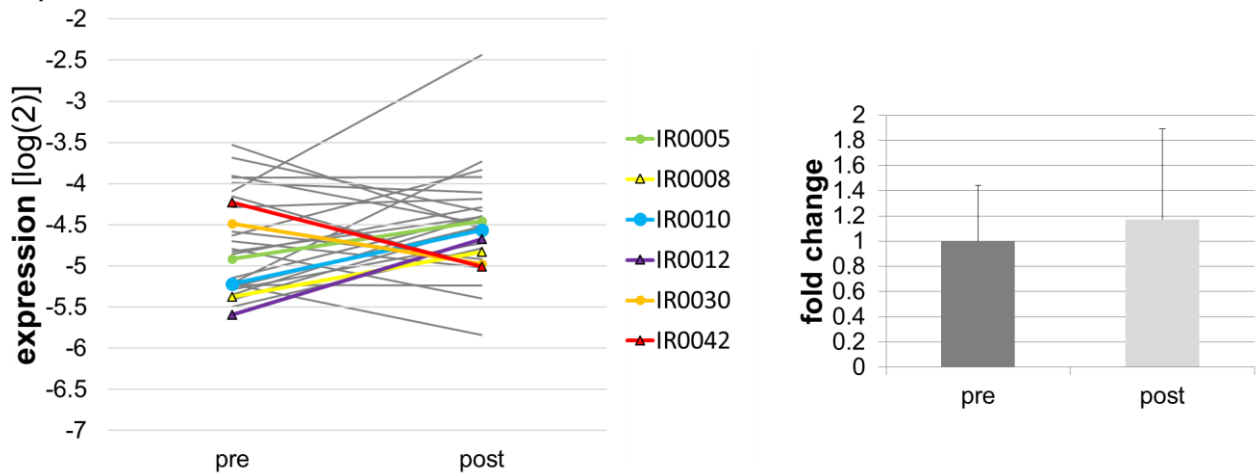

c)

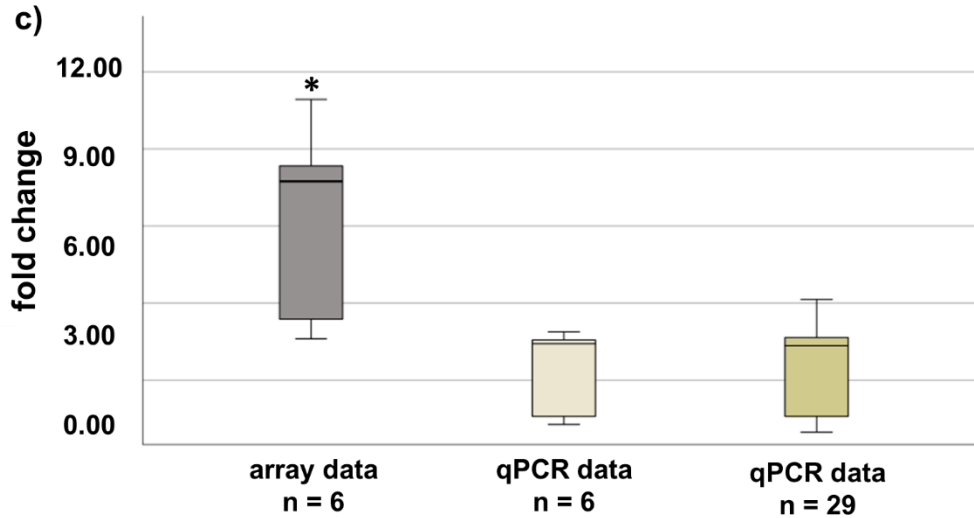

a) hsa-miR-155-5p array data

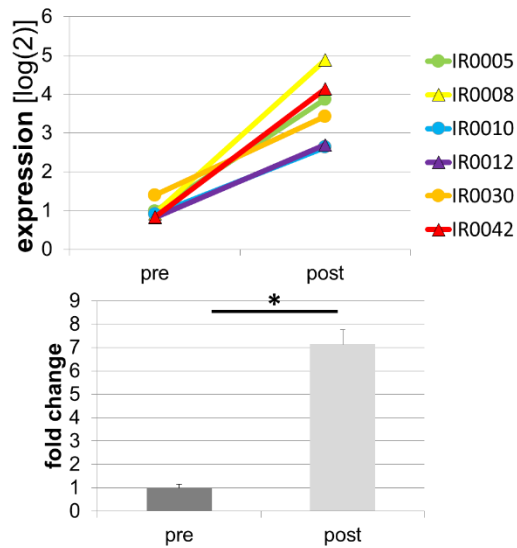

hsa-miR-155-5p qPCR data

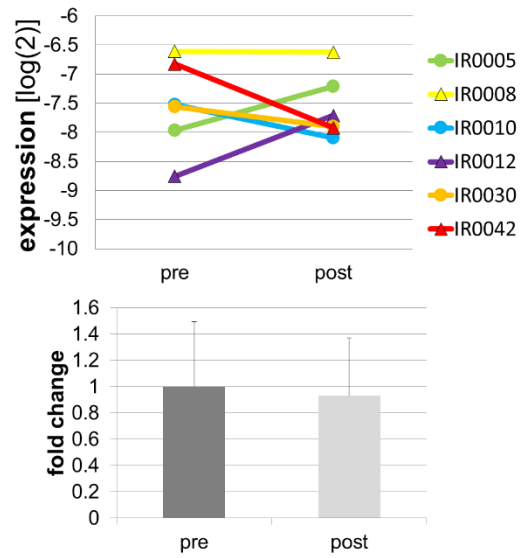

b) hsa-miR-155-5p qPCR data

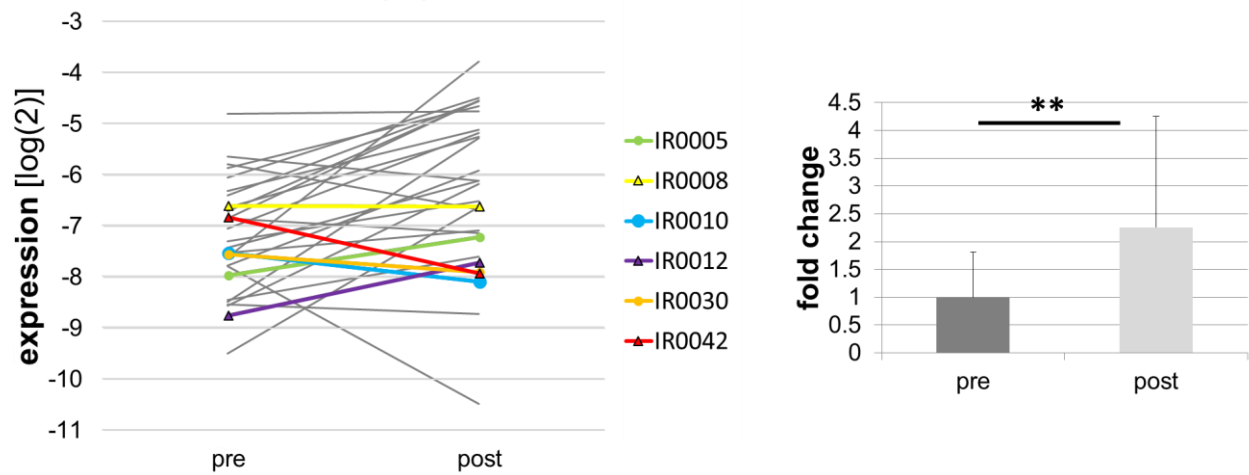

c)

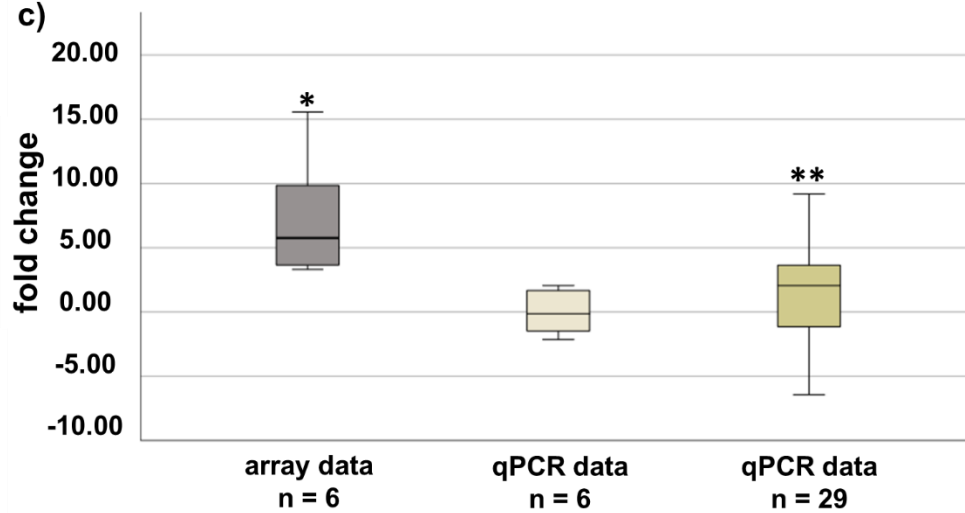

**Suppl. Fig.1 (previous pages). Changes in miR concentrations in skeletal muscle tissue in response to a single bout of exercise.** (a) Comparison of microarray and qPCR data (n=6). (b) Changes in miR concentrations as assessed by qPCR in all participants (n=29). (c) Fold changes as detected by microarray (n=6), qPCR (n=6), and qPCR (n=29). Subjects of the MICT-HIIT group are labelled with circles, those of the HIIT-MICT group with triangles.
